# Supplementary material for: Multi-spectral imaging with infrared sensitive organic light emitting diode
Source: PubMed Central journal article supplement — Sci Rep. 2014 Aug 5;4:5946. doi: 10.1038/srep05946 (PMC5380012; doi:10.1038/srep05946), 2014-08-05
Supplement: srep05946-s1.pdf [file srep05946-s1.pdf]

## Supplementary Information

### Multi-spectral imaging with infrared sensitive organic light emitting diode

Do Young Kim, Tzung-Han Lai, Jae Woong Lee, Jesse Manders, and Franky So\*

Department of Materials Science and Engineering, University of Florida, Gainesville, FL 32611 (USA).

\*Correspondence to: [fso@mse.ufl.edu](mailto:fso@mse.ufl.edu)

### Supplementary Figures

**a**

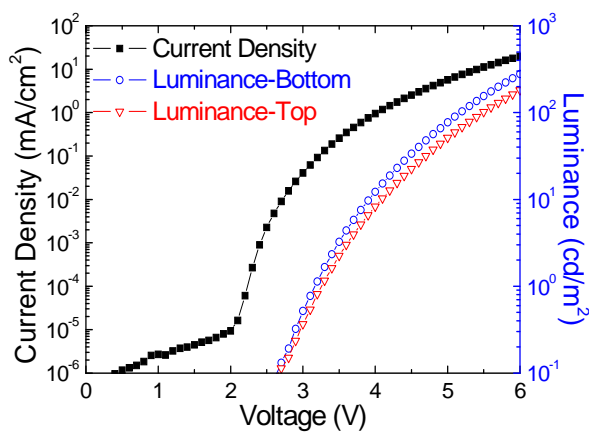

**b**

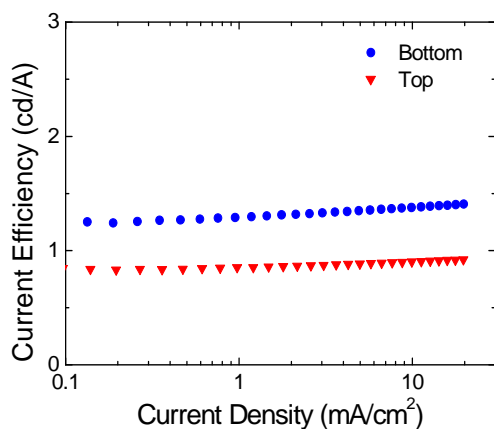

**Figure S1.** (a) Luminance-current density-voltage (L-I-V) characteristics and (b) current efficiencies plot of the transparent OLED with the Mg:Ag/Alq<sub>3</sub> transparent top cathode.

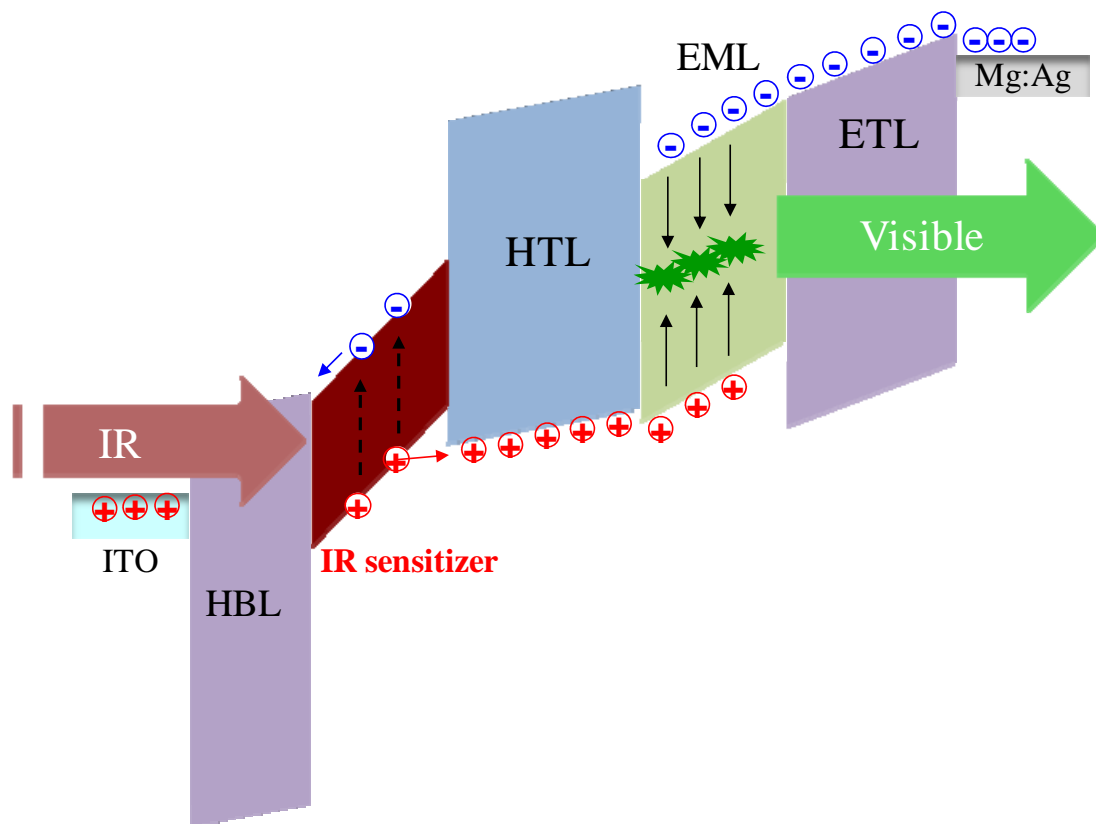

**Figure S2.** Schematic energy band diagrams of the IR sensitive OLED in the IR illumination.

a

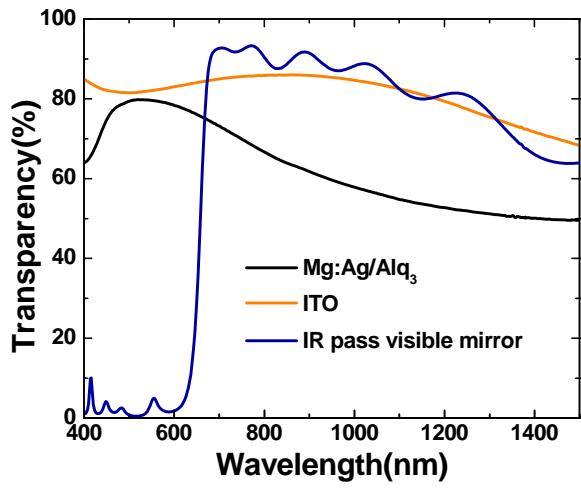

b

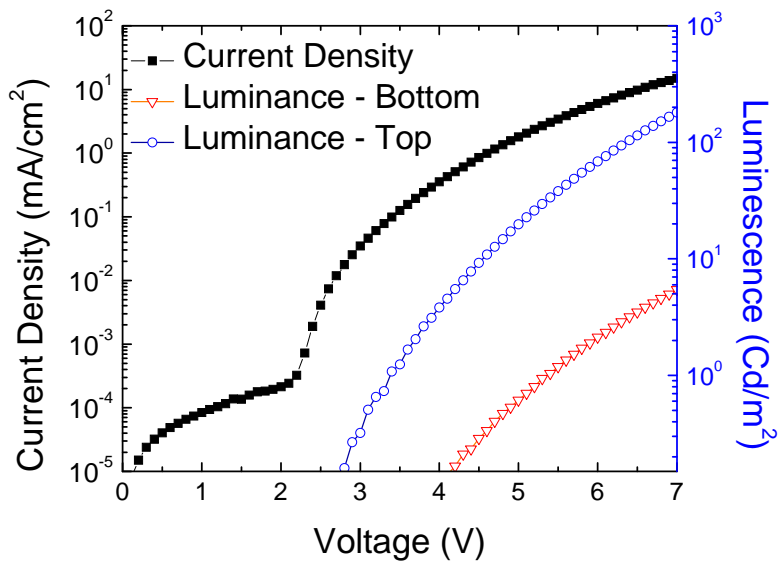

c

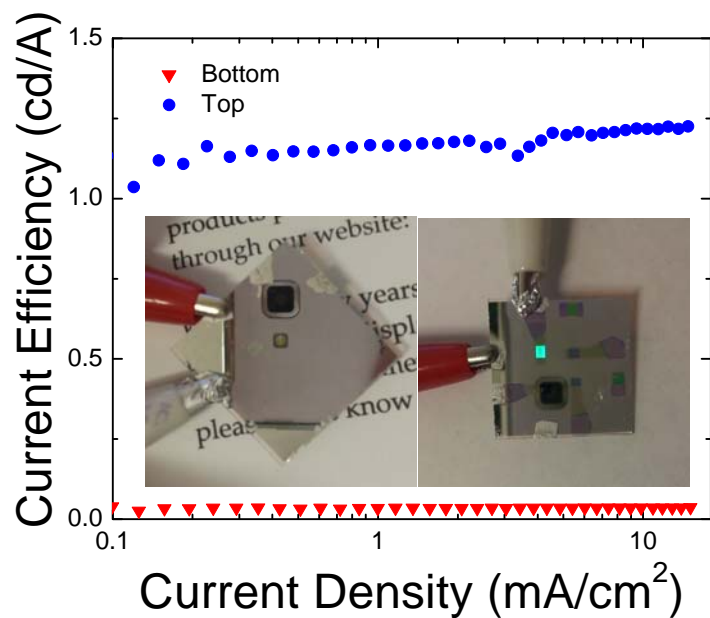

**Figure S3.** (a) the transparency spectra of the ITO anode as a control bottom electrode, the IPVM/ITO anode as a IR transparent, visible reflective bottom electrode, and the Mg:Ag/Alq<sub>3</sub> cathode as a visible transparent top electrode, and (b) L-I-V characteristics and (c) current efficiencies plot of the top emitting OLED with the IPVM/ITO bottom electrode and the Mg:Ag/Alq<sub>3</sub> top electrodes.

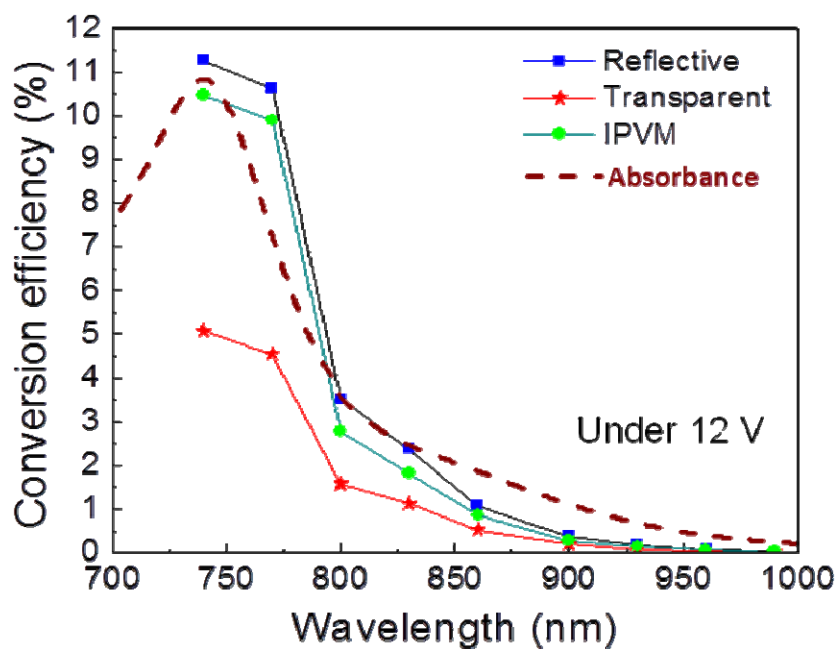

**Figure S4.** Comparison of spectral p-p conversion efficiencies of reflective, transparent, and IPVM IR-OLEDs with the SnPc:C<sub>60</sub> IR sensitizer and the absorption spectrum of the SnPc:C<sub>60</sub> IR sensitizing film.

**a**

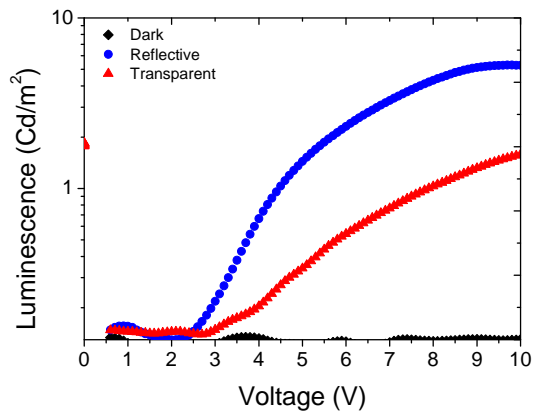

**b**

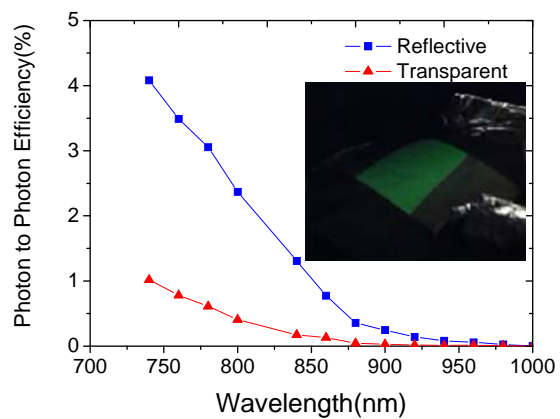

**Figure S5.** (a) L-V characteristics and (b) spectral p-p conversion efficiencies of the flexible IR-OLEDs (insert - the image of a flexible device).

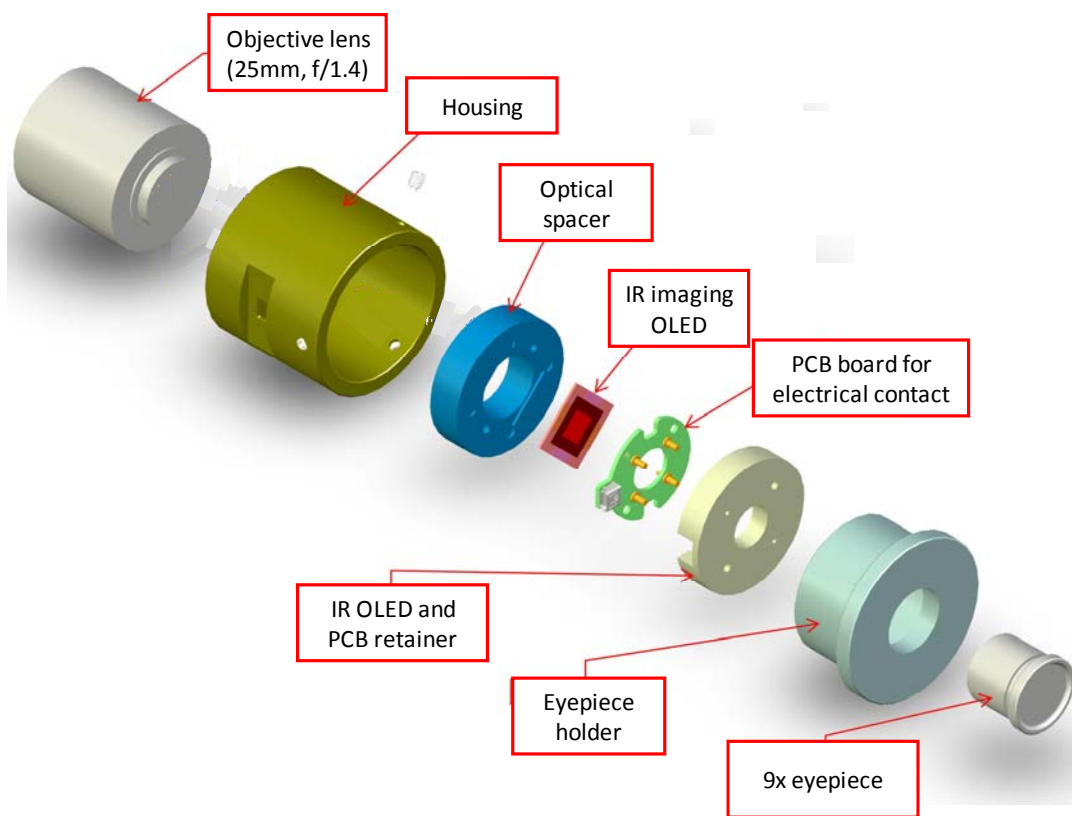

**Figure S6.** Schematic diagram of the monocular direct view IR imager with the transparent IR-OLEDs.



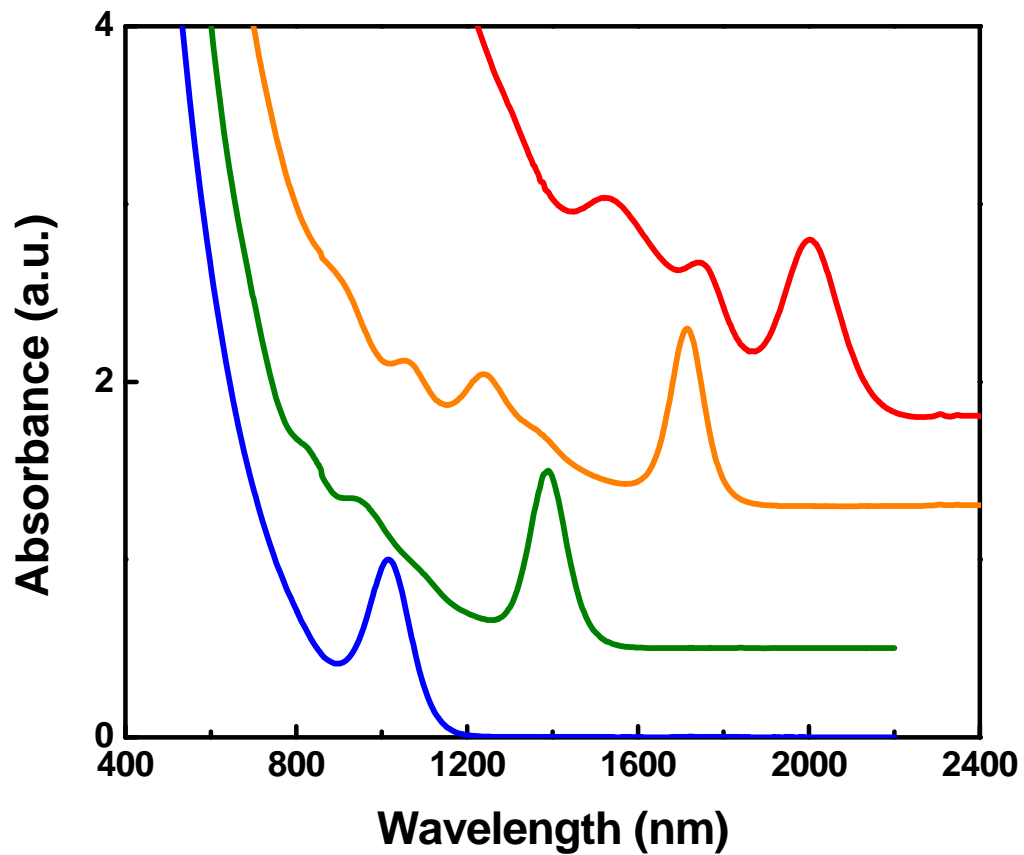

**Figure S7.** Absorption spectra of PbS nanocrystals.
